# Supplementary material for: Oligourea helix bundle binds detergents with diverse polar head groups
Source: Royal Society of Chemistry journal article supplement (doi:10.1039/d3ob01873c), 2023-12-18
Supplement: d3ob01873c6.pdf [file d3ob01873c6.pdf]

*Supplementary Information*

**Oligourea helix bundle binds detergents with diverse polar head groups**

Sung Hyun Yoo,<sup>a,b</sup> Jérémie Buratto,<sup>a</sup> Arup Roy,<sup>a</sup> Morgane Pasco,<sup>a</sup> Karolina Pulka-Ziach,<sup>c</sup> Gavin W. Collie,<sup>\*d</sup> and Gilles Guichard<sup>\*a</sup>

<sup>a</sup>Univ. Bordeaux, CNRS, Bordeaux INP, CBMN, UMR 5248, IECB, 2 rue Robert Escarpit, 33607, Pessac, France.

<sup>b</sup>Department of Chemistry, Chonnam National University, Gwangju 61186, Republic of Korea

<sup>c</sup>Faculty of Chemistry, University of Warsaw, 02093 Warsaw, Poland.

<sup>d</sup>Discovery Sciences, R&D, AstraZeneca, Cambridge CB4 0WG, U.K.

\*gavin.collie@astrazeneca.com and g.guichard@iecb.u-bordeaux.fr

**Table of contents**

|                                                                                                         |    |
|---------------------------------------------------------------------------------------------------------|----|
| <b>Supplementary materials and methods</b> .....                                                        | S2 |
| Materials .....                                                                                         | S2 |
| Circular dichroism (CD).....                                                                            | S2 |
| Crystallography.....                                                                                    | S2 |
| <b>Supplementary figures</b> .....                                                                      | S3 |
| Figure S1. Overlaid <b>H1</b> 6-helix bundles from the five different <b>H1</b> -ligand complexes ..... | S3 |
| Figure S2. Electron density maps for the <b>H1</b> -ligand complexes .....                              | S3 |
| Figure S3. CD-monitored variable-temperature experiment results .....                                   | S4 |
| Figure S4. CD-monitored titration of CTAB analogues into <b>H1</b> .....                                | S5 |
| <b>Supplementary tables</b> .....                                                                       | S6 |
| Table S1. Data collection and refinement statistics for X-ray crystal structures.....                   | S6 |
| Table S2. Biophysical analysis based on CD experiments of <b>H1</b> -ligand complexes .....             | S6 |
| <b>Supplementary references</b> .....                                                                   | S7 |

## Supplementary materials and methods

### Materials

Unless stated otherwise, reagents were purchased from Sigma Aldrich. C<sub>8</sub>E<sub>6</sub>, C<sub>12</sub>E<sub>9</sub>, F<sub>6</sub>OPC, Mega-10 for CD experiment were purchased from Anatrace. High purity water (MQ H<sub>2</sub>O) for biophysical experiments (crystallization and CD) was generated by Milli-Q apparatus (Millipore). **H1** was prepared following the reported procedures.<sup>1</sup>

### Circular dichroism (CD)

Circular dichroism (CD) experiments were performed on a Jasco J-815 spectrometer. A quartz cell with a path length of 1 mm was used.

Ligand-dependent CD experiments were performed in aqueous solutions of foldamers at a concentration of 200 μM in the absence or the presence of detergent ligands at a concentration of 200 μM. Each sample solution of 500 μL in an Eppendorf tube was heated at 80 °C for 20 minutes, cooled to 4 °C and kept at 4 °C overnight prior to use for CD experiments. The data were recorded at 4 °C between wavelengths of 190 and 250 nm at 0.5 nm intervals at a speed of 50 nm/min with an integration time of 2 seconds.

Temperature-dependent CD experiments were performed in the same solution used for the ligand-dependent CD experiments. For these experiments, samples were heated from 4 °C to 90 °C using a gradient of 1 °C/min. The mid-point of the transition (T<sub>1/2</sub>) values were determined by fitting temperature-dependent CD data to a simple two-state Boltzmann unfolding model using OriginPro 9.0.

CD-monitored titration of CTAB analogues into foldamers were performed in 300 μL of aqueous solutions starting from an foldamer concentration of 100 μM followed by serial addition of 4 μL of CTAB analogue solutions. The concentrations of added CTAB analogue solutions varied as 0.47 mM, 0.47 mM, 0.94 mM, 1.9 mM, 3.8 mM, 7.5 mM, 23 mM and 38 mM to adjust [Oligourea]:[Ligand] as 1:16, 1:8, 1:4, 1:2, 1:1, 2:1, 5:1 and 10:1, respectively. The data for CD-monitored titration were recorded at 20 °C between wavelengths of 190 and 250 nm at 0.5 nm intervals at a speed of 50 nm/min with an integration time of 2 seconds. The CD-monitored titration data were fitted to the Hill equation (considering the reaction as Bundle + n(Ligand) ⇌ Bundle(Ligand)<sub>n</sub>) using OriginPro 9.0 by considering [**H1**] as 100 μM and [Ligand] as from 6.25 μM to 1 mM.

Note: Micelle formation of the ligands can also influence helical propensity of foldamers. Concentrations of the ligands for CD experiments were carefully designed to be below CMC (critical micelle concentration) values of ligands,<sup>2</sup> except C<sub>12</sub>E<sub>9</sub>. Excluding the CD analysis of the C<sub>12</sub>E<sub>9</sub> case, the trend observed in the CD analysis consistently support the hypothesis that the binding of the ligand enhances the stability of the bundle complex.

### Crystallography

Cocrystals of **H1** grown in the presence of various detergent-based ligands were obtained following previously reported procedures.<sup>3</sup> Briefly, a purified, lyophilized powder of **H1** was dissolved in MQ water to a concentration of around 10 mg/mL. 0.5 – 1 μL of this solution was then mixed with an equal volume of crystallisation reagent (listed in Table S1) and equilibrated as a hanging drop against a well solution composed of around 500 μL of crystallisation reagent. Prior to data collection crystals were typically cryoprotected in a solution composed of the crystallisation reagent supplemented with 20 – 25% glycerol and frozen in liquid nitrogen. Diffraction data were collected at the SOLEIL Synchrotron (France) for **H1**-Mega-10, **H1**-C<sub>8</sub>E<sub>6</sub>, **H1**-C<sub>12</sub>E<sub>9</sub>, **H1**-F<sub>6</sub>OPC, and at the European Synchrotron Radiation Facility (ESRF, France) for **H1**-CTAB. The diffraction data were integrated and scaled using XDS<sup>4</sup> and CCP4.<sup>5</sup> The structures were solved by molecular replacement using previously reported X-ray structures as search models<sup>3</sup> using Phaser<sup>6</sup> from the CCP4 suite.<sup>5</sup> Geometric restraints for detergents were generated using PRODRG<sup>7</sup> with model building and restrained refinement performed in Coot<sup>8</sup> and Refmac5,<sup>9</sup> respectively. Data collection and refinement statistics can be found in Table S1. The structures have been deposited in the CCDC with accession codes listed in Table S1.

## Supplementary figures

### Overlapped **H1** helices

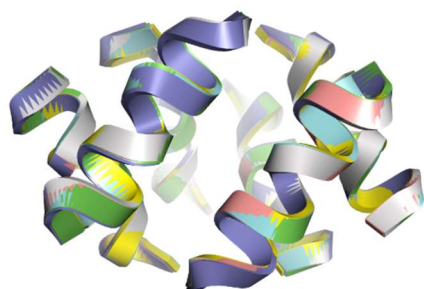

Average R.M.S.D. ( $^{\beta}C$ ) = 0.144 Å

**Figure S1.** Overlay of **H1** 6-helix bundles from crystal structures of **H1**-ligand complexes. Average R.M.S.D. for  $^{\beta}C$  is 0.144 Å.

a) H1-Mega-10

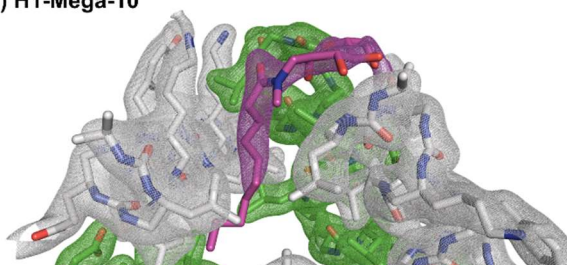

b) H1-C<sub>8</sub>E<sub>6</sub>

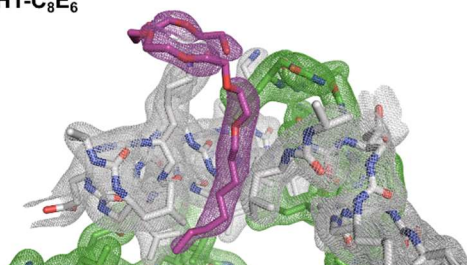

c) H1-C<sub>12</sub>E<sub>9</sub>

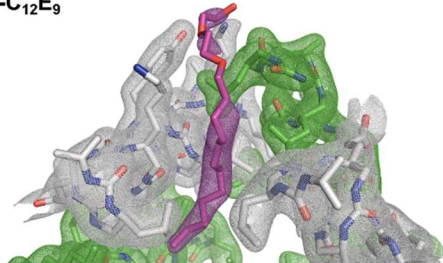

d) H1-CTAB

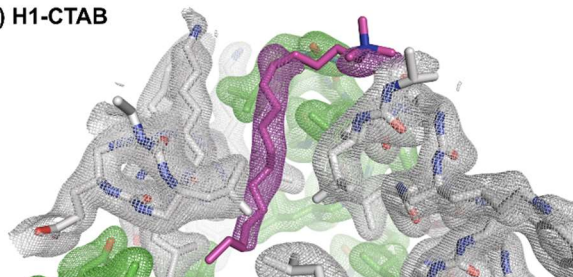

e) H1-F<sub>6</sub>OPC

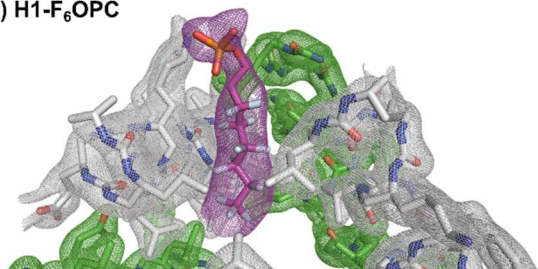

**Figure S2.** Electron density maps ( $2mF_o - DF_c$ ) at a  $\sigma$  level of 1.0 of the **H1**-ligand complexes focused on the ligand colored in magenta (ligands: (a) Mega-10, (b) C<sub>8</sub>E<sub>6</sub>, (c) C<sub>12</sub>E<sub>9</sub>, (d) CTAB, and (e) F<sub>6</sub>OPC)

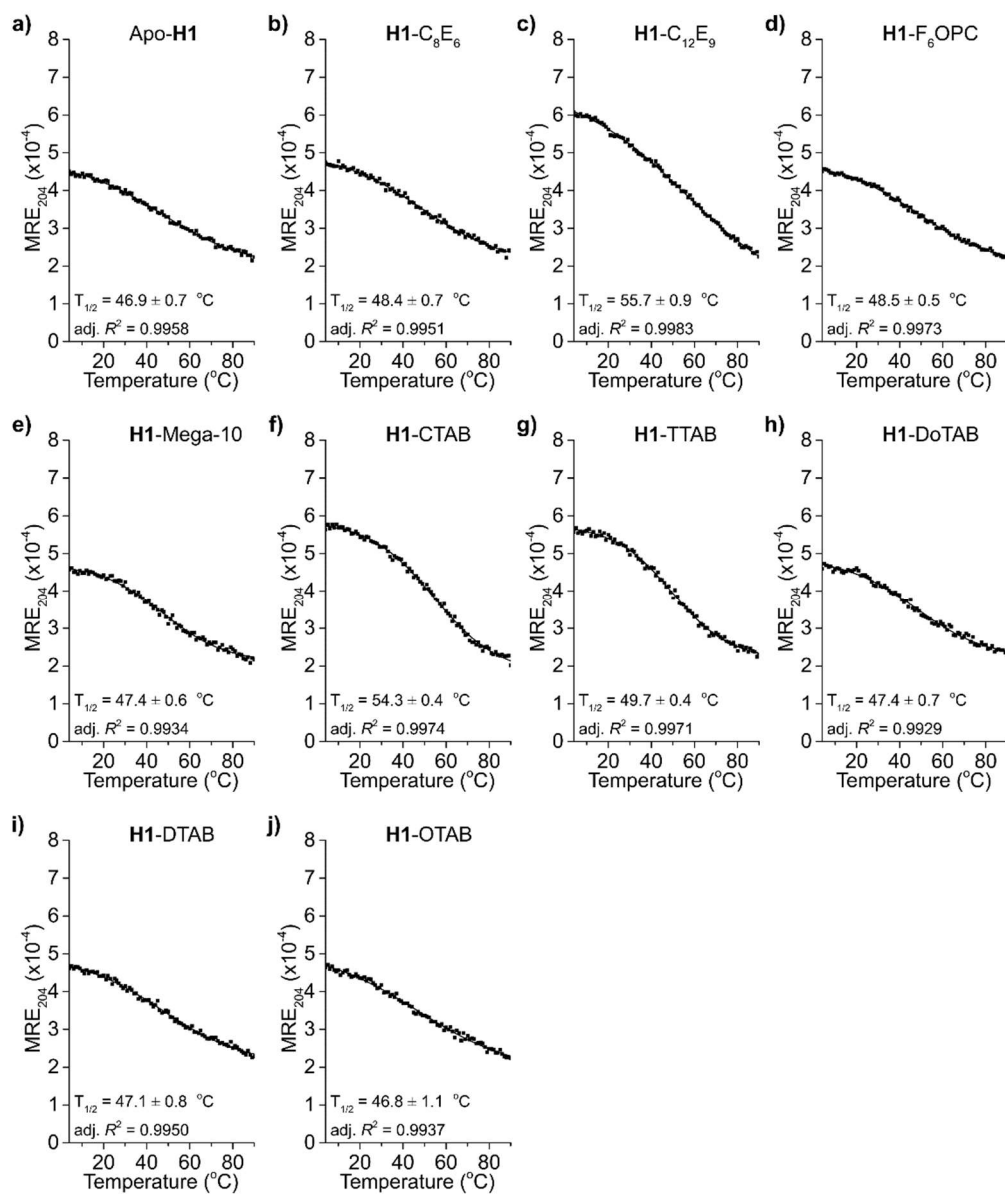

**Figure S3.** CD-monitored variable-temperature experiment data of **H1** at a concentration of 200  $\mu\text{M}$  (a) in the absence and (b – j) in the presence of ligands at a concentration of 200  $\mu\text{M}$  (1 equiv. to **H1**). Lines represent simple two-state Boltzmann unfolding model fits.

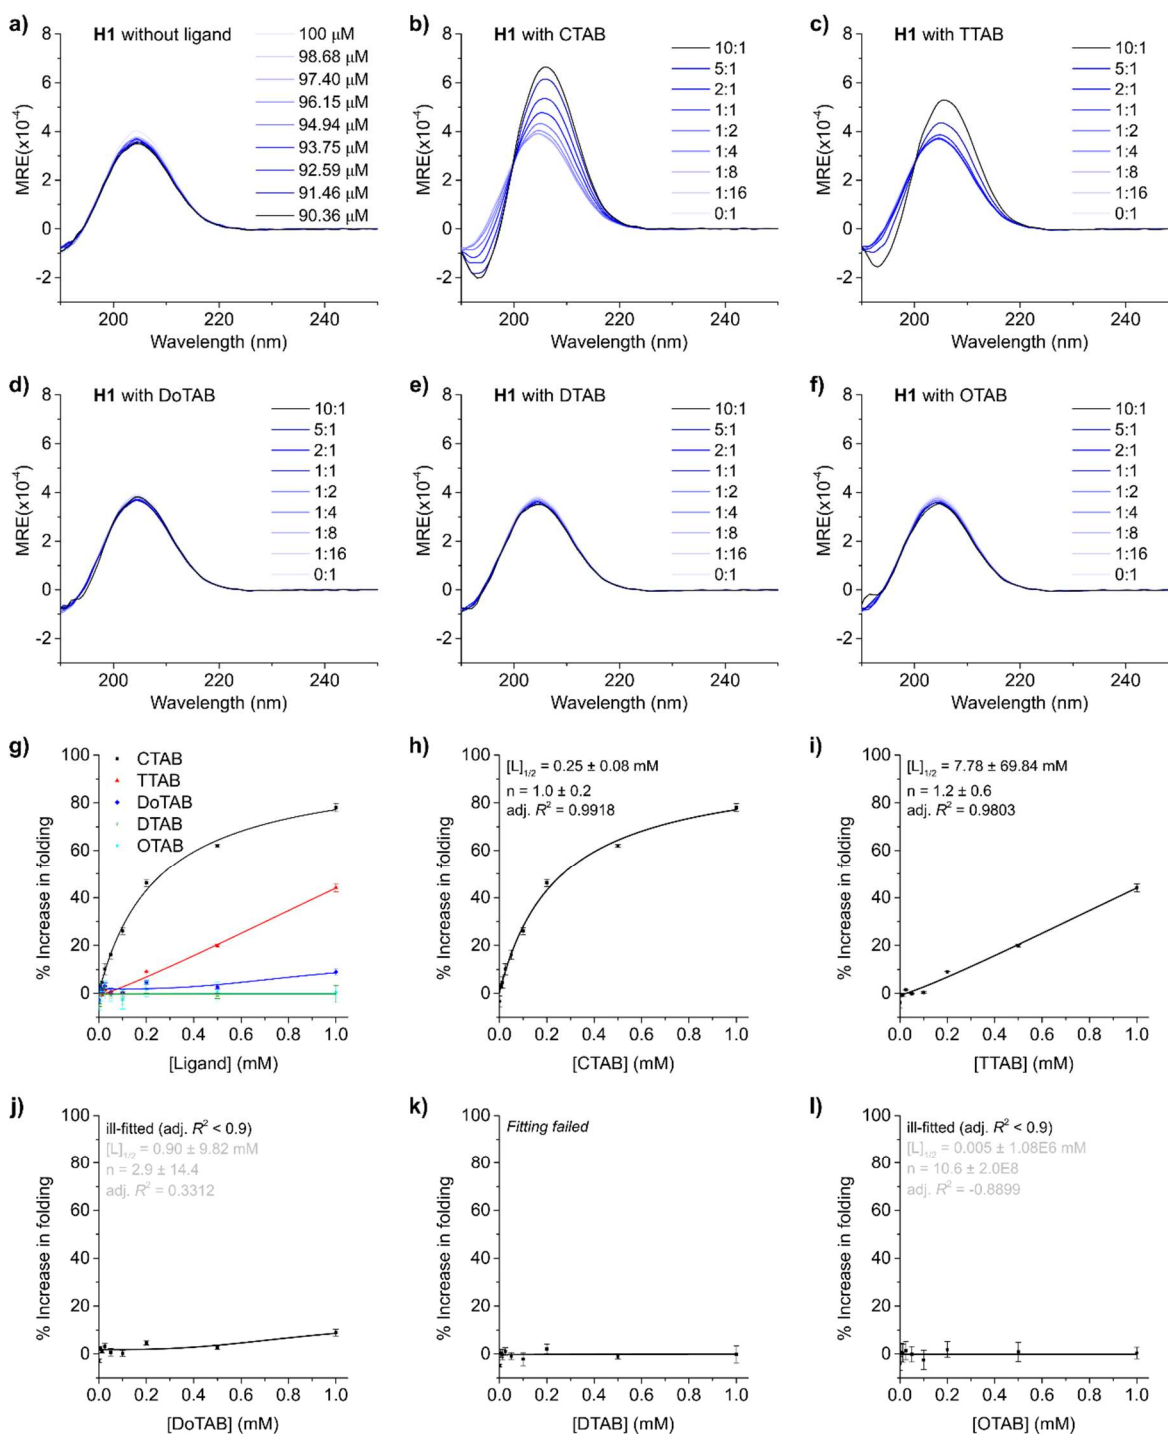

**Figure S4.** CD-monitored titration of CTAB analogues into H1. 4  $\mu$ L of CTAB analogue solutions ((a) water as control, (b) CTAB, (c) TTAB, (d) DoTAB, (e) DTAB and (f) OTAB) were sequentially added to 300  $\mu$ L of H1 at a concentration of 100  $\mu$ M. Ratios in (b – f) correspond to the molar ratio between CTAB analogues and H1. CD curves with ligands are averaged values of triplicate measurements. (g – l) Hill plot fitting of CD-monitored titration data.  $[L]_{1/2}$  represents the ligand concentration needed to occupy half of the binding sites.  $n$  represents the Hill coefficient. Fitted data with  $\text{adj. } R^2 < 0.9$  have not been considered and are indicated in light grey for information only. Error bars are the standard deviation of three experiments.

## Supplementary tables

**Table S1.** Data collection and refinement statistics for X-ray crystal structures of **H1** cocrystallised with various detergents

| Detergent                                 | CTAB                       | C <sub>8</sub> E <sub>6</sub>                     | C <sub>12</sub> E <sub>9</sub>                    | F <sub>6</sub> OPC                   | Mega-10                    |
|-------------------------------------------|----------------------------|---------------------------------------------------|---------------------------------------------------|--------------------------------------|----------------------------|
| Crystallisation reagent                   | 100 mM NaCl, 13 mM CTAB    | 100 mM NaCl, 100 mM C <sub>8</sub> E <sub>6</sub> | 100mM NaCl, 0.5 mM C <sub>12</sub> E <sub>9</sub> | 100mM NaCl, 22 mM F <sub>6</sub> OPC | 100mM NaCl, 70 mM Mega-10  |
| Data collection                           |                            |                                                   |                                                   |                                      |                            |
| Space group                               | <i>I</i> 2 <sub>1</sub> 3  | <i>I</i> 4 <sub>1</sub> 32                        | <i>I</i> 4 <sub>1</sub> 32                        | <i>I</i> 4 <sub>1</sub> 32           | <i>I</i> 4 <sub>1</sub> 32 |
| a, b, c (Å)                               | 74.15, 74.15, 74.15        | 73.977, 73.977, 73.977                            | 73.760, 73.760, 73.760                            | 75.04, 75.04, 75.04                  | 73.863, 73.863, 73.863     |
| α, β, γ (°)                               | 90, 90, 90                 | 90, 90, 90                                        | 90, 90, 90                                        | 90, 90, 90                           | 90, 90, 90                 |
| Resolution (Å)                            | 37.07 – 1.87 (1.99 – 1.87) | 52.31 – 1.80 (1.91 – 1.80)                        | 52.16 – 1.70 (1.80 – 1.70)                        | 53.06 – 1.70 (1.80 – 1.70)           | 30.15 – 1.80 (1.91 – 1.80) |
| R <sub>meas</sub> (%)                     | 5.7 (81.6)                 | 8.4 (441.8)                                       | 5.0 (512.8)                                       | 5.7 (440.1)                          | 7.0 (535.5)                |
| l / σ                                     | 23.19 (2.65)               | 32.05 (1.12)                                      | 45.21 (0.79)                                      | 44.11 (1.30)                         | 38.84 (0.84)               |
| Reflections (total)                       | 62748                      | 258045                                            | 302008                                            | 314600                               | 248791                     |
| Reflections (unique)                      | 5741                       | 3437                                              | 4039                                              | 4235                                 | 3417                       |
| Completeness (%)                          | 100                        | 100                                               | 100                                               | 100                                  | 99.9                       |
| Redundancy                                | 10.9                       | 75.1                                              | 74.8                                              | 74.3                                 | 72.81                      |
| Refinement                                |                            |                                                   |                                                   |                                      |                            |
| Resolution (Å)                            | 52.43 – 1.87               | 52.31 – 1.80                                      | 52.16 – 1.70                                      | 53.06 – 1.70                         | 30.15 – 1.80               |
| R <sub>work</sub> / R <sub>free</sub> (%) | 22.51 / 24.69              | 19.33 / 21.06                                     | 19.64 / 22.54                                     | 20.31 / 20.26                        | 19.22 / 25.41              |
| Atoms                                     | 304                        | 149                                               | 141                                               | 148                                  | 146                        |
| Waters                                    | 20                         | 12                                                | 9                                                 | 9                                    | 11                         |
| Overall B-factor (Å <sup>2</sup> )        | 43.27                      | 58.58                                             | 63.25                                             | 58.89                                | 62.96                      |
| R.m.s. deviations                         |                            |                                                   |                                                   |                                      |                            |
| Bond-lengths (Å)                          | 0.016                      | 0.016                                             | 0.015                                             | 0.0213                               | 0.0132                     |
| Bond-angles (°)                           | 1.877                      | 1.961                                             | 1.797                                             | 1.7465                               | 2.0770                     |
| CCDC code                                 | 2292246                    | 2298232                                           | 2298233                                           | 2298234                              | 2298235                    |

**Table S2.** Biophysical analysis based on CD experiments of **H1**-ligand complexes.

| Ligand                         | % increase in folding <sup>a</sup> | Temperature-dependent              |                     |
|--------------------------------|------------------------------------|------------------------------------|---------------------|
|                                |                                    | T <sub>1/2</sub> (°C) <sup>b</sup> | adj. R <sup>2</sup> |
| No ligand                      | -                                  | 46.9                               | 0.9958              |
| Mega-10                        | 0                                  | 47.4                               | 0.9934              |
| F <sub>6</sub> OPC             | 0                                  | 48.5                               | 0.9973              |
| C <sub>8</sub> E <sub>6</sub>  | 5                                  | 48.4                               | 0.9951              |
| C <sub>12</sub> E <sub>9</sub> | 35                                 | 55.7                               | 0.9983              |
| CTAB                           | 29                                 | 54.3                               | 0.9974              |

<sup>a</sup> % increase in folding values (% increase of MRE<sub>204</sub> of interest versus MRE<sub>204</sub> of **H1** alone) at a ligand concentration of 0.2 mM and **H1** concentration of 0.2 mM.

<sup>b</sup> The midpoint of the transition (T<sub>1/2</sub>) values was estimated by fitting temperature-dependent CD data to a simple two-state Boltzmann unfolding model using OriginPro 9.0 (See Figure S3).

### Supplementary references

- 1 G. W. Collie, K. Pulka-Ziach, C. M. Lombardo, J. Fremaux, F. Rosu, M. Decossas, L. Mauran, O. Lambert, V. Gabelica, C. D. Mackereth and G. Guichard, *Nat. Chem.*, 2015, **7**, 871–878.
- 2 (a) For C<sub>8</sub>E<sub>6</sub>: M. le Maire, P. Champeil and J. V. Moller, *Biochim. Biophys. Acta*, 2000, **1508**, 86–111. (b) For C<sub>12</sub>E<sub>9</sub>: R. C. Mast and L. V. Haynes, *J. Colloid Interface Sci.*, 1975, **53**, 35–41. (c) For Mega-10: M. Hanatani, K. Nishifuji, M. Futai, and T. Tsuchiya, *J. Biochem.*, 1984, **95**, 1349–1353. (d) For F<sub>6</sub>OPC: E. Frotscher, B. Danielczak, C. Vargas, A. Meister, G. Durand, and S. Keller, *Angew. Chemie. Int. Ed.*, 2015, **54**, 5069–5073. (e) For CTAB analogues: P. Mukerjee and K. J. Mysels, *Critical Micelle Concentrations of Aqueous Surfactant Systems*, NSRDS-NBS, Washington, D.C., 1971.
- 3 S. H. Yoo, J. Buratto, A. Roy, E. Morvan, M. Pasco, K. Pulka-Ziach, C. M. Lombardo, F. Rosu, V. Gabelica, C. D. Mackereth, G. W. Collie and G. Guichard, *J. Am. Chem. Soc.*, 2022, **144**, 15988–15998.
- 4 W. Kabsch, *Acta Cryst.*, 2010, **D66**, 125–132.
- 5 M. D. Winn, C. C. Ballard, K. D. Cowtan, E. J. Dodson, P. Emsley, P. R. Evans, R. M. Keegan, E. B. Krissinel, A. G. W. Leslie, A. McCoy, S. J. McNicholas, G. N. Murshudov, N. S. Pannu, E. A. Potterton, H. R. Powell, R. J. Read, A. Vagin and K. S. Wilson, *Acta Cryst.*, 2011, **D67**, 235–242.
- 6 A. J. McCoy, R. W. Grosse-Kunstleve, P. D. Adams, M. D. Winn, L. C. Storoni and R. J. Read, *J. Appl. Crystallogr.*, 2007, **40**, 658–674.
- 7 A. W. Schüttelkopf and D. M. F. Van Aalten, *Acta Cryst.*, 2004, **D60**, 1355–1363.
- 8 P. Emsley and K. Cowtan, *Acta Cryst.*, 2004, **D60**, 2126–2132.
- 9 G. N. Murshudov, P. Skubák, A. A. Lebedev, N. S. Pannu, R. A. Steiner, R. A. Nicholls, M. D. Winn, F. Long and A. A. Vagin, *Acta Cryst.*, 2011, **D67**, 355–367.
